# Supplementary material for: A Crustin from Hydrothermal Vent Shrimp: Antimicrobial Activity and Mechanism
Source: Mar Drugs. 2021 Mar 23;19(3):176. doi: 10.3390/md19030176 (PMC8005205; doi:10.3390/md19030176)

## Supplementary data

**Table S1.** The bactericidal activity of rCrus1 variants.

| <b>Crustin</b> | <b><i>B. cereus</i></b> | <b><i>M. luteus</i></b> |
|----------------|-------------------------|-------------------------|
| control        | —                       | —                       |
| rTrx           | —                       | —                       |
| rCrus1         | +                       | +                       |
| rCrus1-C64S    | —                       | —                       |
| rCrus1-C70S    | —                       | —                       |
| rCrus1-C80S    | —                       | —                       |
| rCrus1-C86S    | —                       | —                       |
| rCrus1-C92S    | —                       | —                       |
| rCrus1-C93S    | —                       | —                       |
| rCrus1-C97S    | —                       | —                       |
| rCrus1-C103S   | —                       | —                       |

+: Bactericidal activity was detected at 1×MBC of rCrus1.

—: No bactericidal activity was detected at 1×MBC of rCrus1.

**Table S2.** Primers used in point mutation.

| Primer name | Sequence (5'-3')                             |
|-------------|----------------------------------------------|
| Cys64-F     | 5'-GGAACACAAAGGAGAGTGTCTGAGGTGCG-3'          |
| Cys64-R     | 5'-CGCACCTCAGGACACTCTCCTTTGTGTTCC-3'         |
| Cys70-F     | 5'-GTCCTGAGGTGCGACCCAGCCCAGGGATAAAGTTC-3'    |
| Cys70-R     | 5'-GAACTTTATCCCTGGGCTGGGTCGCACCTCAGGAC-3'    |
| Cys80-F     | 5'-GATAAAGTTCTCCCCCAACTGAGTCCCCATGAC-3'      |
| Cys80-R     | 5'-GTCATGGGGACTCAGTTGGGGGGAGAACTTTATC-3'     |
| Cys86-F     | 5'-GTCCCCATGACGGTCACAGCAAACGCAACG-3'         |
| Cys86-R     | 5'-CGTTGCGTTTGCTGTGACCGTCATGGGGAC-3'         |
| Cys92-F     | 5'-GCAAACGCAACGAAAAGAGTTGCTACGACTCTTGCC-3'   |
| Cys92-R     | 5'-GGCAAGAGTCGTAGCAACTCTTTTCGTTGCGTTTGC-3'   |
| Cys93-F     | 5'-CAAACGCAACGAAAAGTGTAGCTACGACTCTTGCCTCG-3' |
| Cys93-R     | 5'-CGAGGCAAGAGTCGTAGCTACACTTTTCGTTGCGTTTG-3' |
| Cys97-F     | 5'-GTTGCTACGACTCTAGCCTCGAGCACCACG-3'         |
| Cys97-R     | 5'-CGTGGTGCTCGAGGCTAGAGTCGTAGCAAC-3'         |
| Cys103-F    | 5'-AGCACCACGCCAGCAAGCTCGCCTCCAATGCACAT-3'    |
| Cys103-R    | 5'-ATGTGCATTGGAGGCGAGCTTGCTGGCGTGGTGCT-3'    |

**Figure S1.** SDS-PAGE analysis of rCrus1. Purified rCrus1 (lane1) was analyzed by SDS-PAGE and viewed after staining with Coomassie brilliant blue R-250.

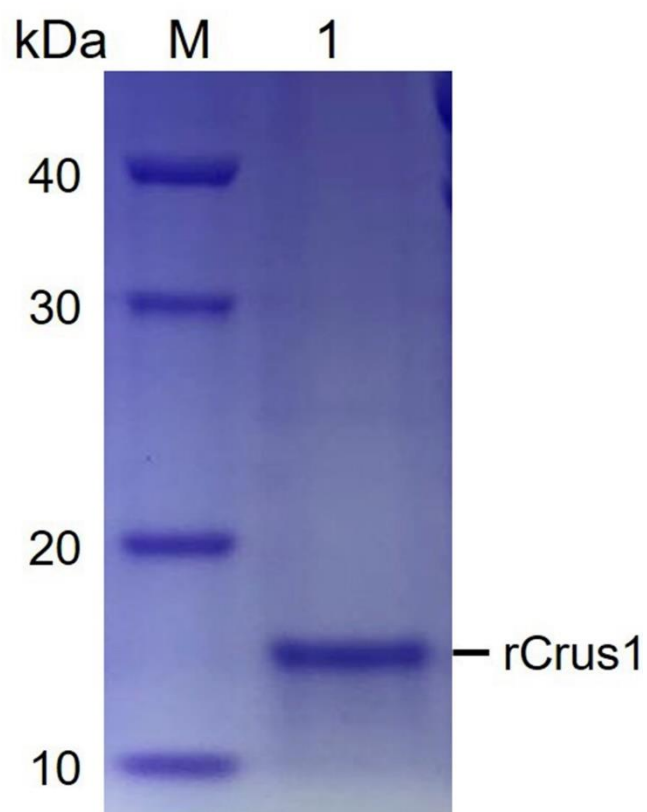

**Figure S2.** Effect of temperature (A) and pH (B) on the antibacterial activity of rCrus1 against *Vibrio harveyi*. (A) *V. harveyi* was incubated with or without (control) rCrus1 at various temperatures for 2 h, and bacterial survival was determined by plate count. (B) *V. harveyi* was incubated with or without (control) rCrus1 at various pH for 2 h, and bacterial survival was determined as above. Values are shown as means  $\pm$  SD (N = 3). N, the number of replicate.

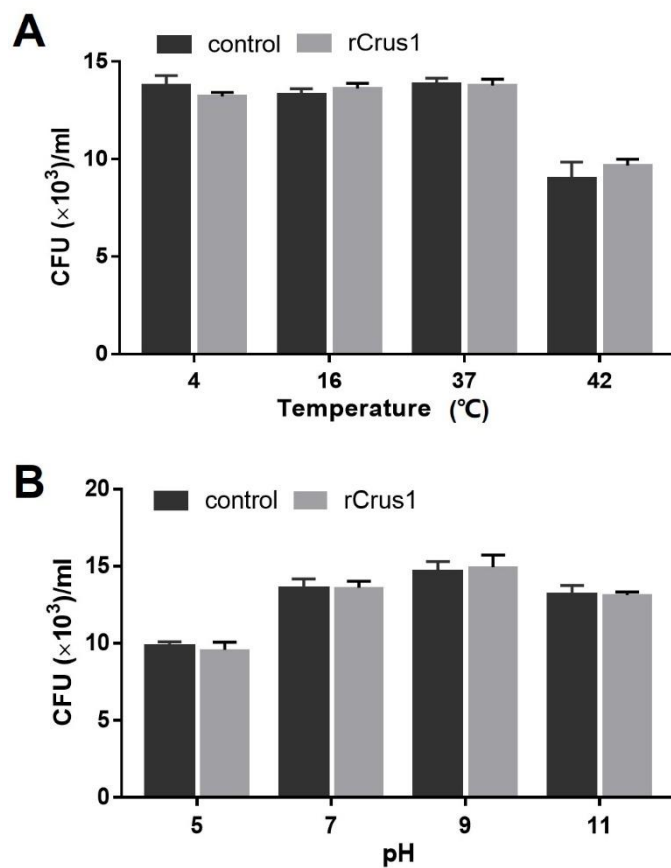

**Figure S3.** Time-dependent bactericidal activity of rCrus1 against *Micrococcus luteus*. *M. luteus* was grown in MHB supplemented with or without (control) rCrus1 at the condition of pH 7 and 37°C. Bacterial survival was determined at various time points by plate count. Values are shown as means  $\pm$  SD (N = 3). N, the number of replicate.

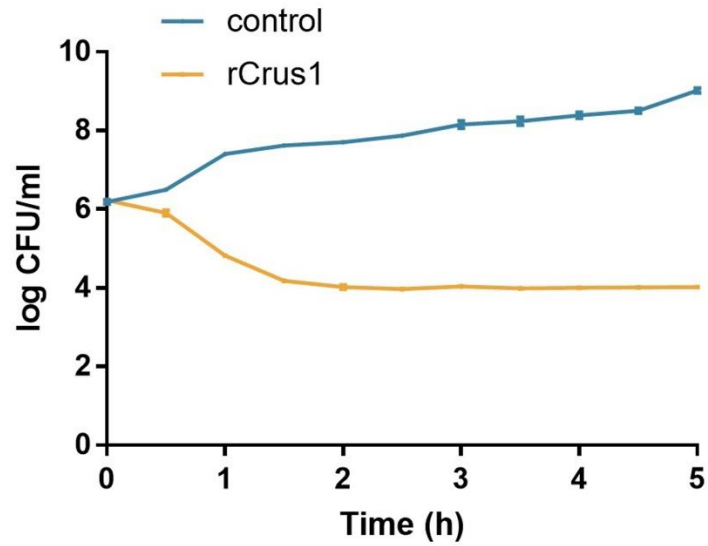

**Figure S4.** Binding of rCrus1 to Gram-negative bacteria. *Escherichia coli*, *Edwardsiella tarda*, *Pseudomonas fluorescens*, *Vibrio anguillarum*, and *Vibrio harveyi* were incubated with rCrus1, rTrx, or PBS (control) for 1 h, and the bound rCrus1 was detected by ELISA. Values are shown as means  $\pm$  SD (N = 3). N, the number of replicate. \*\* $P < 0.01$ , (Student's t test).

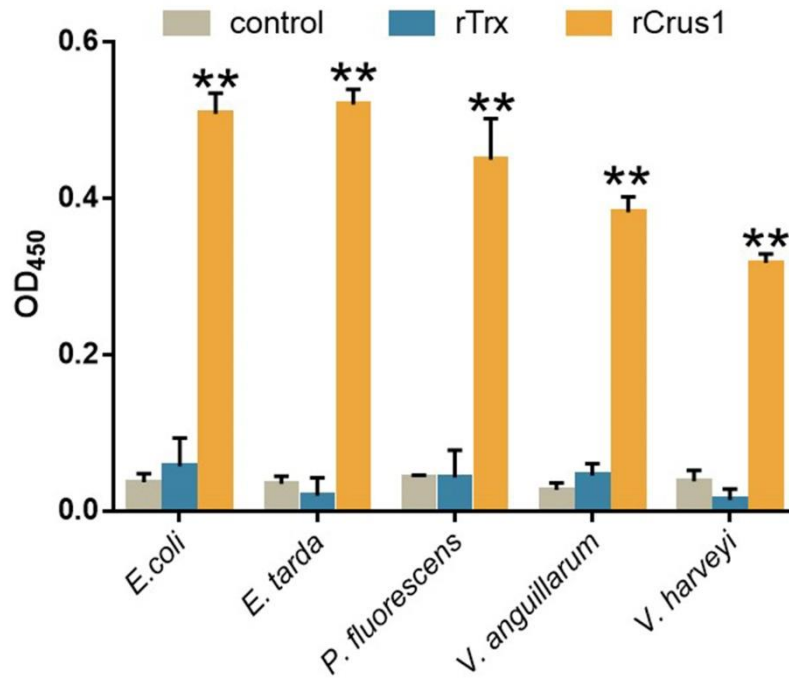

**Figure S5.** The potential effect of rCrus1 on bacterial protoplasts. (A) The protoplasts of *Bacillus subtilis* and *Micrococcus luteus* were incubated with rCrus1, Trion X-100 (positive control), or PBS for 1 h and then measured for absorbance at OD<sub>600</sub>. Values are shown as means  $\pm$  SD (N = 3). N, the number of replicate.  $**P < 0.01$ ,  $*P < 0.05$  (Student's t test). (B) *B. subtilis* (Ba) and *B. subtilis* protoplasts (Bb) were pretreated with His-tagged rCrus1 or rTrx (control) for 1 h, and the bound protein was detected with anti-His-FITC antibody and observed with a fluorescence microscope.

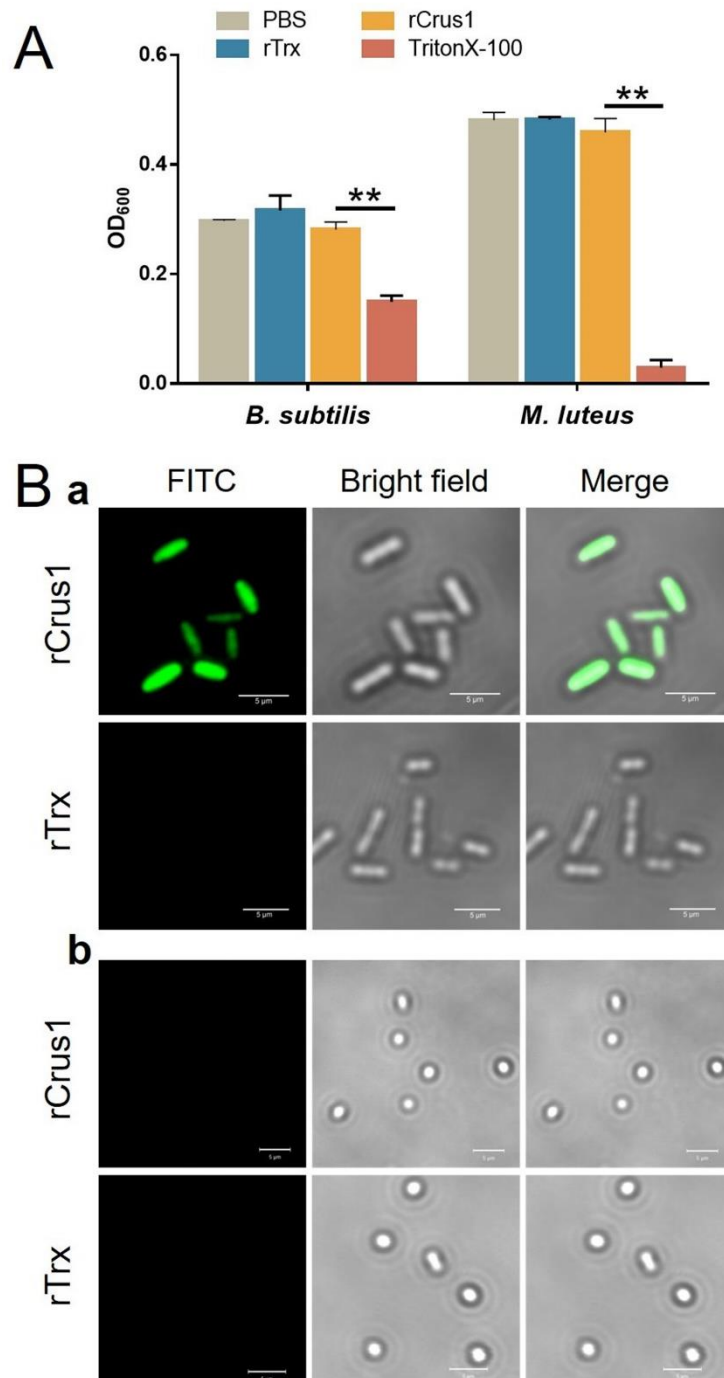

Supplement: Supplementary file 1 [file marinedrugs-19-00176-s001.pdf]
